# Supplementary material for: Combinatorial transcription factor profiles predict mature and functional human islet α and β cells
Source: PubMed Central journal article supplement (PMC8492318; doi:10.1172/jci.insight.151621), 2021-09-22
Supplement: jciinsight-6-151621-s114.pdf [file jciinsight-6-151621-s114.pdf]

**Combinatorial transcription factor profiles predict mature and functional  
human islet  $\alpha$  and  $\beta$  cells**

Shristi Shrestha\*, Diane C. Saunders\*, John T. Walker\*, Joan Camunas-Soler, Xiao-Qing Dai,  
Rachana Haliyur, Radhika Aramandla, Greg Poffenberger, Nripesh Prasad, Rita Bottino, Roland Stein,  
Jean-Philippe Cartailier, Stephen C. J. Parker, Patrick E. MacDonald, Shawn E. Levy, Alvin C.  
Powers#, Marcela Brissova#

\* These authors contributed equally, # Corresponding authors

Supplemental Information

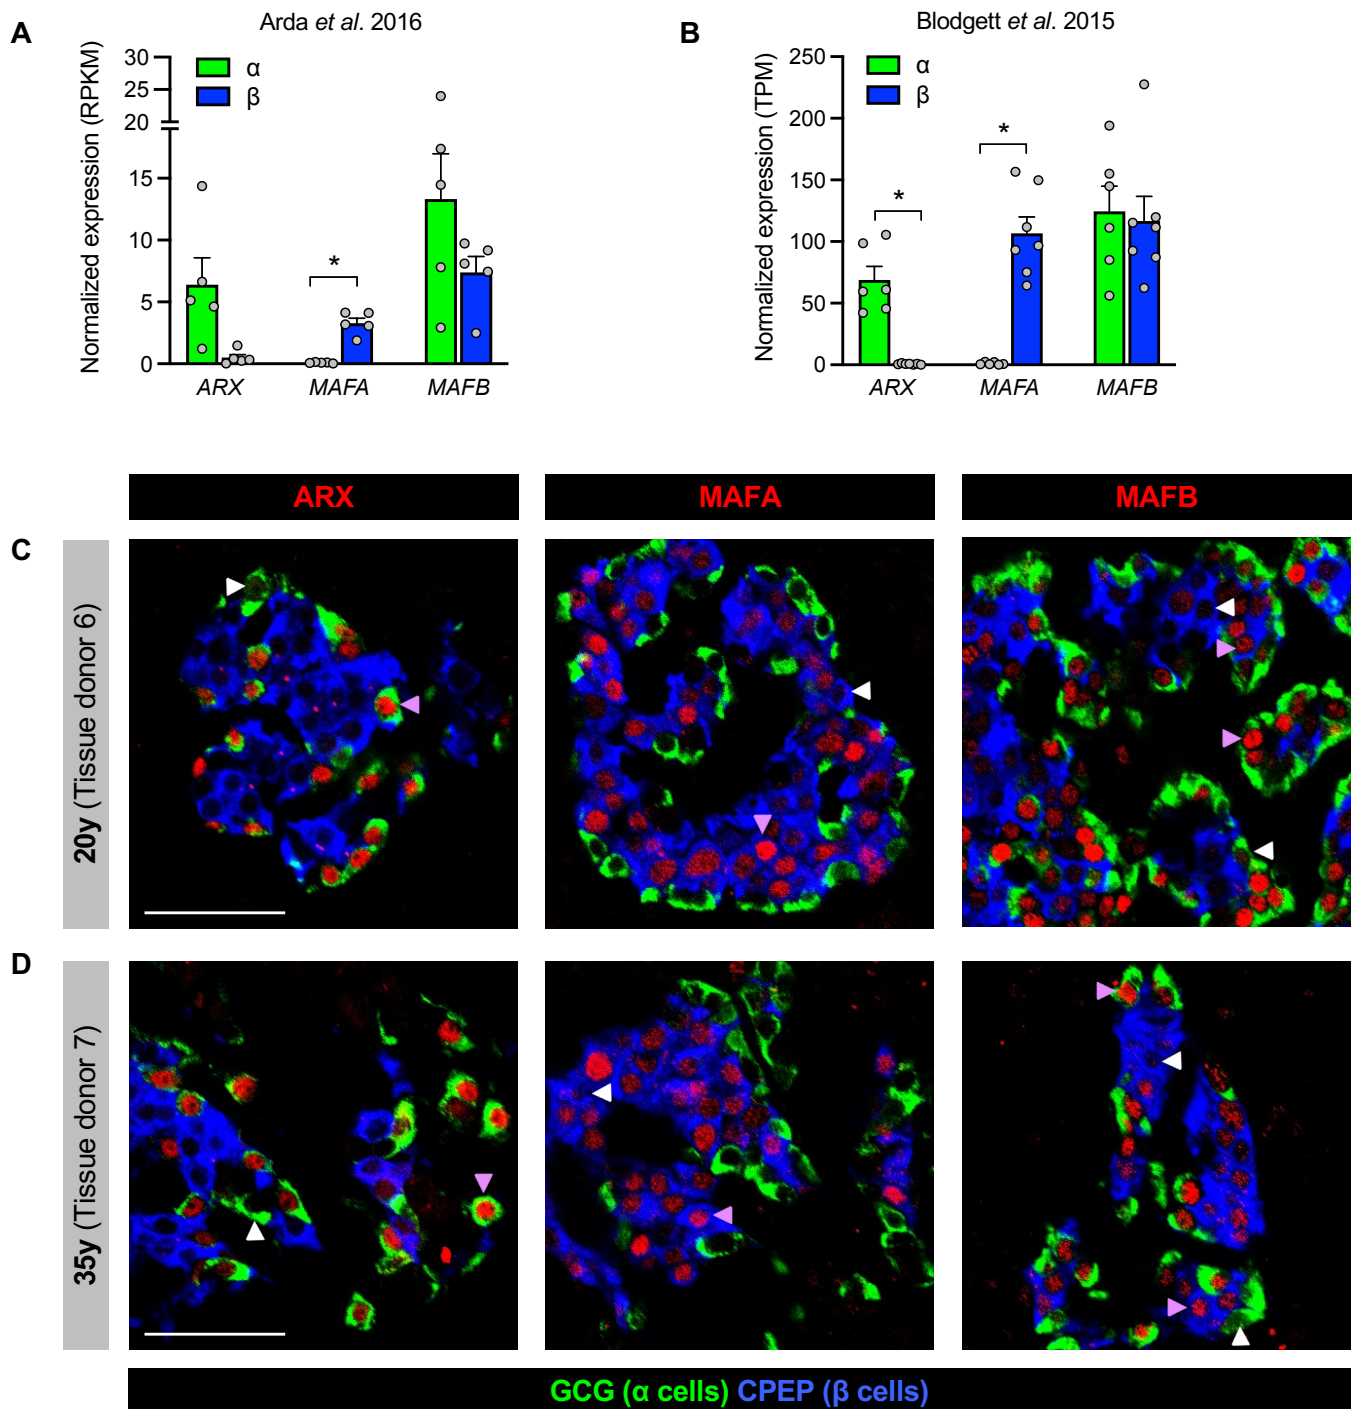

**Supplemental Figure 1. ARX is expressed specifically in human α cells and MAFA in β cells, while MAFB is expressed in both α and β cells. (A–B)** Normalized expression of *ARX*, *MAFA*, and *MAFB* in previously published bulk RNA-sequencing (RNA-seq) datasets Arda *et al.* 2016 (10) (A) and Blodgett *et al.* 2015 (26) (B) from α cells (green) and β cells (blue). Bars in both panels show mean + SEM; symbols represent individual donors. Asterisks indicate significantly different (adjusted p-value <0.05) fold change (α vs. β). See also **Figure 1B. (C–D)** Immunohistochemical staining of pancreatic sections from nondiabetic adults (**Table S4**), showing specificity of *ARX*, *MAFA*, and *MAFB* (red) in α cells (GCG; green) and β cells (CPEP; blue). Arrowheads indicate cells negative (white) or positive (purple) for transcription factors; scale bars, 50 μm. See also **Figure 1C.**

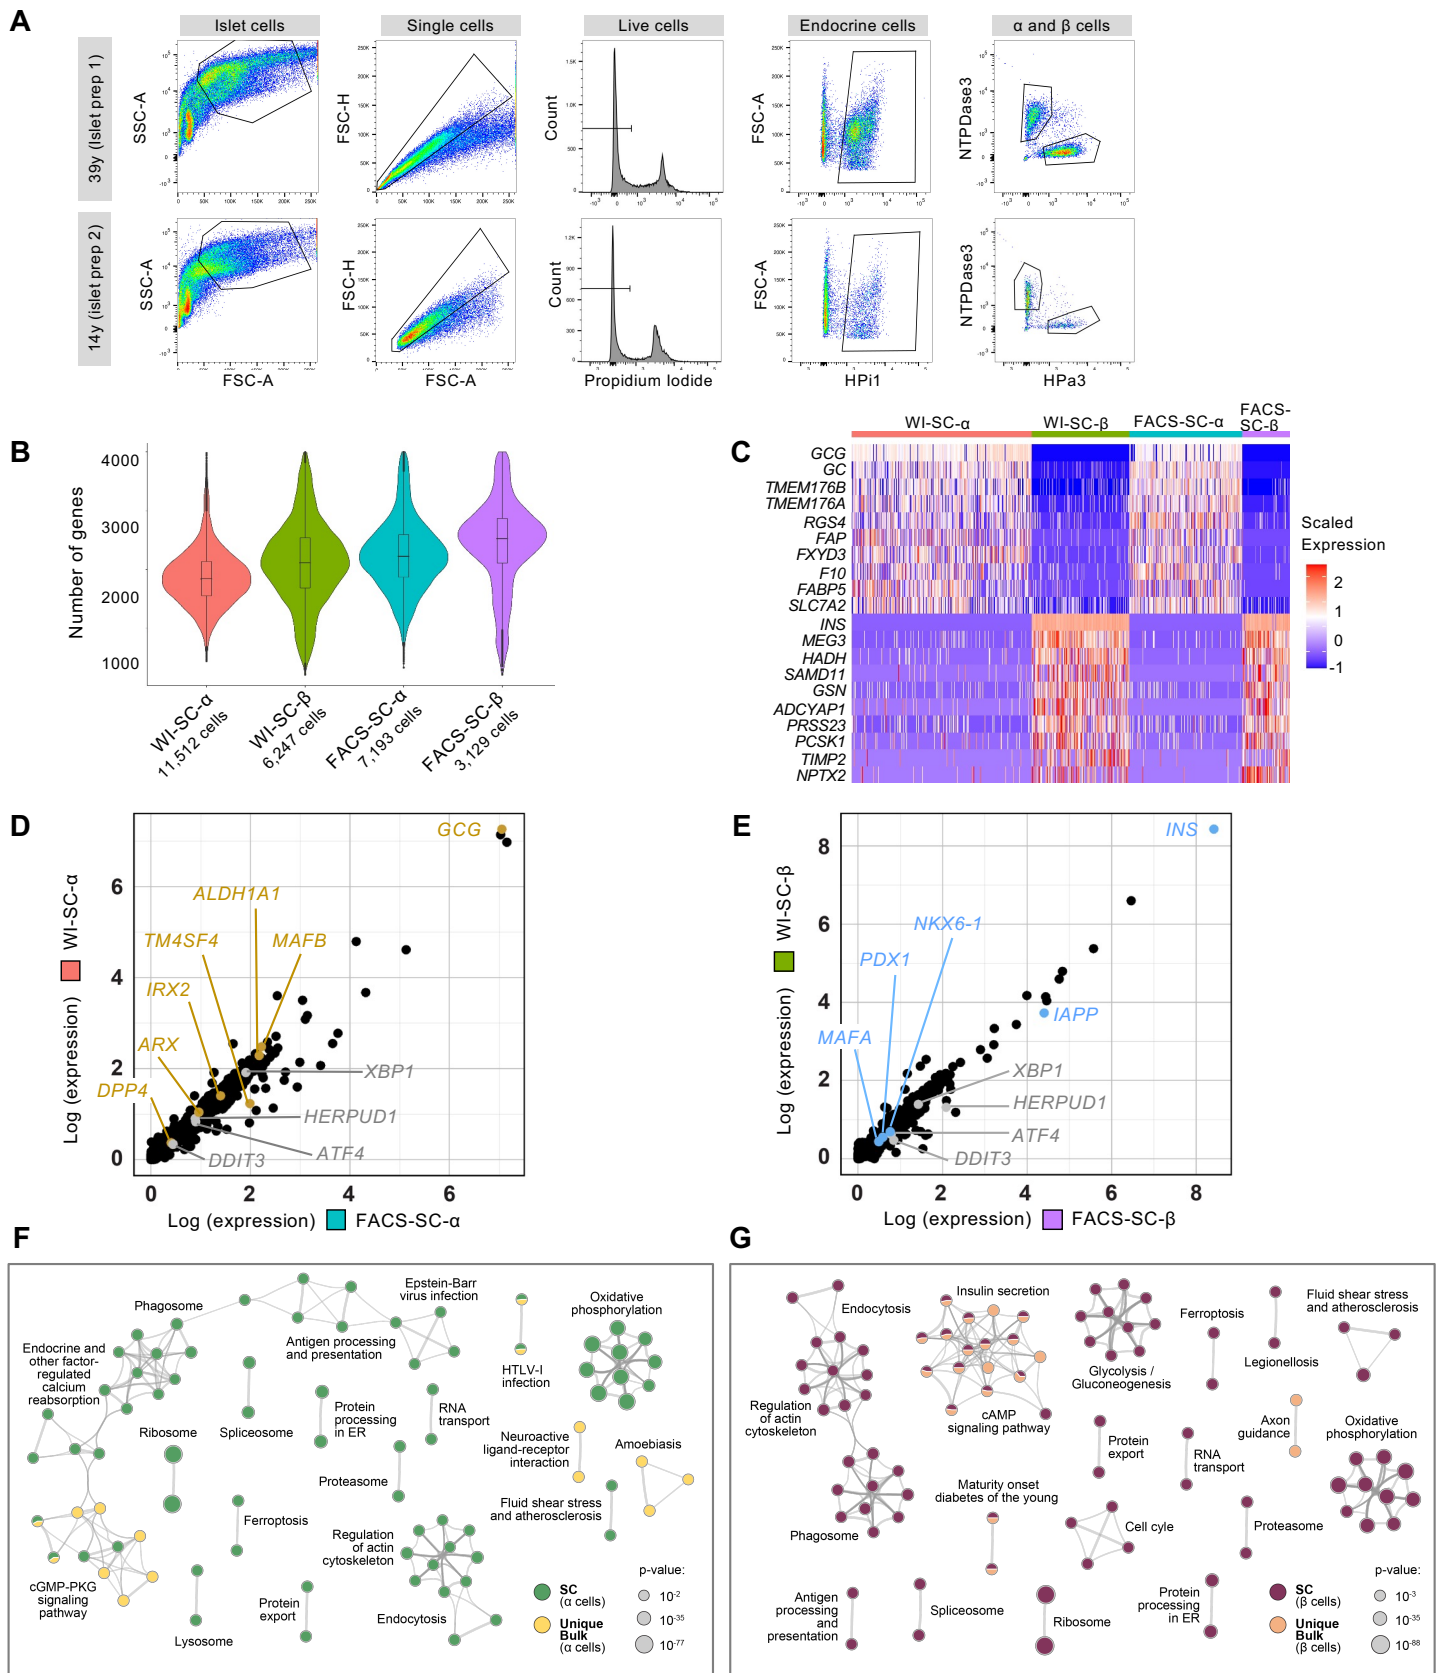

**Supplemental Figure 2. Purified  $\alpha$  and  $\beta$  cells analyzed by cell surface markers and those identified by unsupervised clustering. (A)** Gating strategy for sorted  $\alpha$  and  $\beta$  cells identified by cell surface markers. Cell debris were excluded by forward scatter (FSC) and side scatter (SSC), single cells were identified by voltage pulse geometry (FSC-A v. FSC-H), and non-viable cells were excluded using propidium iodide (PI). Endocrine cell subpopulations were then isolated based on positivity for HPI1 (pan-endocrine marker) and additional positivity for HPa3 ( $\alpha$  cells) or NTPDase3 ( $\beta$  cells). Antibody information can be found in **Table S3**. **(B)** Number of genes detected was similar among  $\alpha$  and  $\beta$  cells identified by cell surface markers and unsupervised clustering. See **Figure 2A** for schematic of experimental design. **(C)** Heatmap depicts expression of genes contributing to variability in PCA of **Figure 2G**. **(D–E)** Comparison of average log expression of genes across cells identified by unsupervised clustering or cell surface markers for  $\alpha$  (**D**) and  $\beta$  cells (**E**). Genes highlighted are  $\alpha$  cell-enriched (yellow),  $\beta$  cell-enriched (blue), or selected markers of cell stress (grey). **(F–G)** KEGG enrichment performed on genes common between scRNA-seq and bulk RNA-seq as well as on the 1,000 most highly expressed genes unique to bulk RNA-seq (**F**,  $\alpha$  cells; **G**,  $\beta$  cells) using Metascape. See also **Figure 2D** and **2F**.

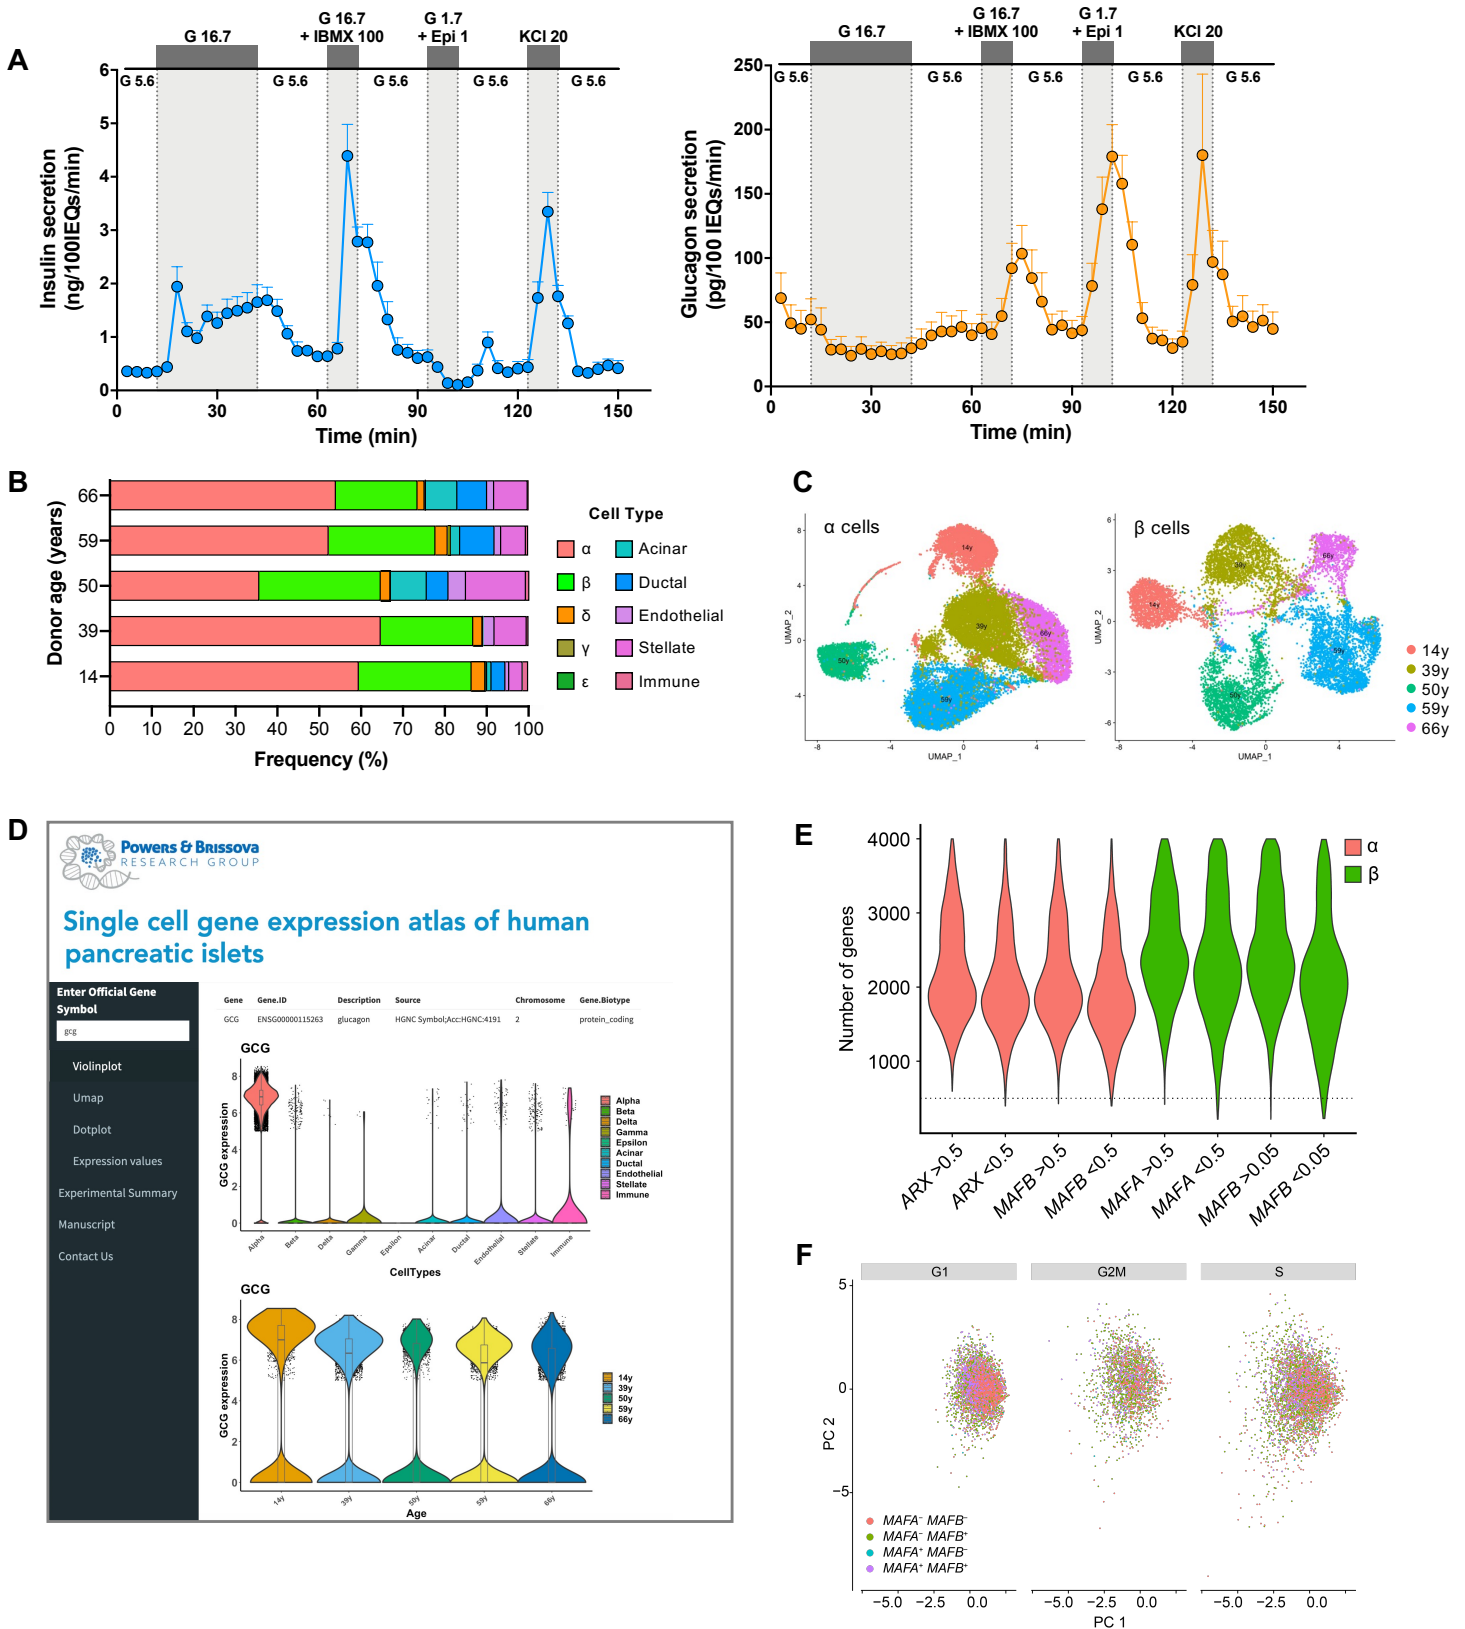

**Supplemental Figure 3. Detailed characterization of endocrine cells from five nondiabetic human islet donors. (A)** Insulin and glucagon secretion were assessed in islets isolated from  $n=5$  donors (age range 14–66 years) stimulated with 5.6 mM glucose (G 5.6), 16.7 mM glucose (G 16.7), 16.7 mM glucose + 100 mM isobutylmethylxanthine (IBMX) (G 16.7 + IBMX 100), 1.7 mM glucose + 1 mM epinephrine (G 1.7 + Epi 1), and 20 mM potassium chloride (KCl 20). Insulin and glucagon secretion is normalized to overall islet cell volume (expressed as islet equivalents; IEQs). **(B)** Bar graph illustrating cell type distribution within each islet preparation as per cell types annotated in **Figure 3A**. **(C)** UMAP of only  $\alpha$  or  $\beta$  cells, showing clustering by islet preparation. See also **Figures 4A** and **5A**. **(D)** User-friendly web portal application for searching and viewing pancreatic cell types and their gene expression; available at <https://powersbrissolab.shinyapps.io/scRNAseq-Islets/>. **(E)** Number of genes detected in cells expressing low ( $\ln[\text{UMI per } 10,000 + 1] < 0.5$ ) or high ( $\ln[\text{UMI per } 10,000 + 1] > 0.5$ ) levels of transcription factors *ARX* and *MAFB* in  $\alpha$  cells (pink) and *MAFA* and *MAFB* in  $\beta$  cells (green); dotted line represents quality threshold of 500 genes. **(F)** PCA showing cell cycle genes among the four *MAFA/MAFB*  $\beta$  cell populations.

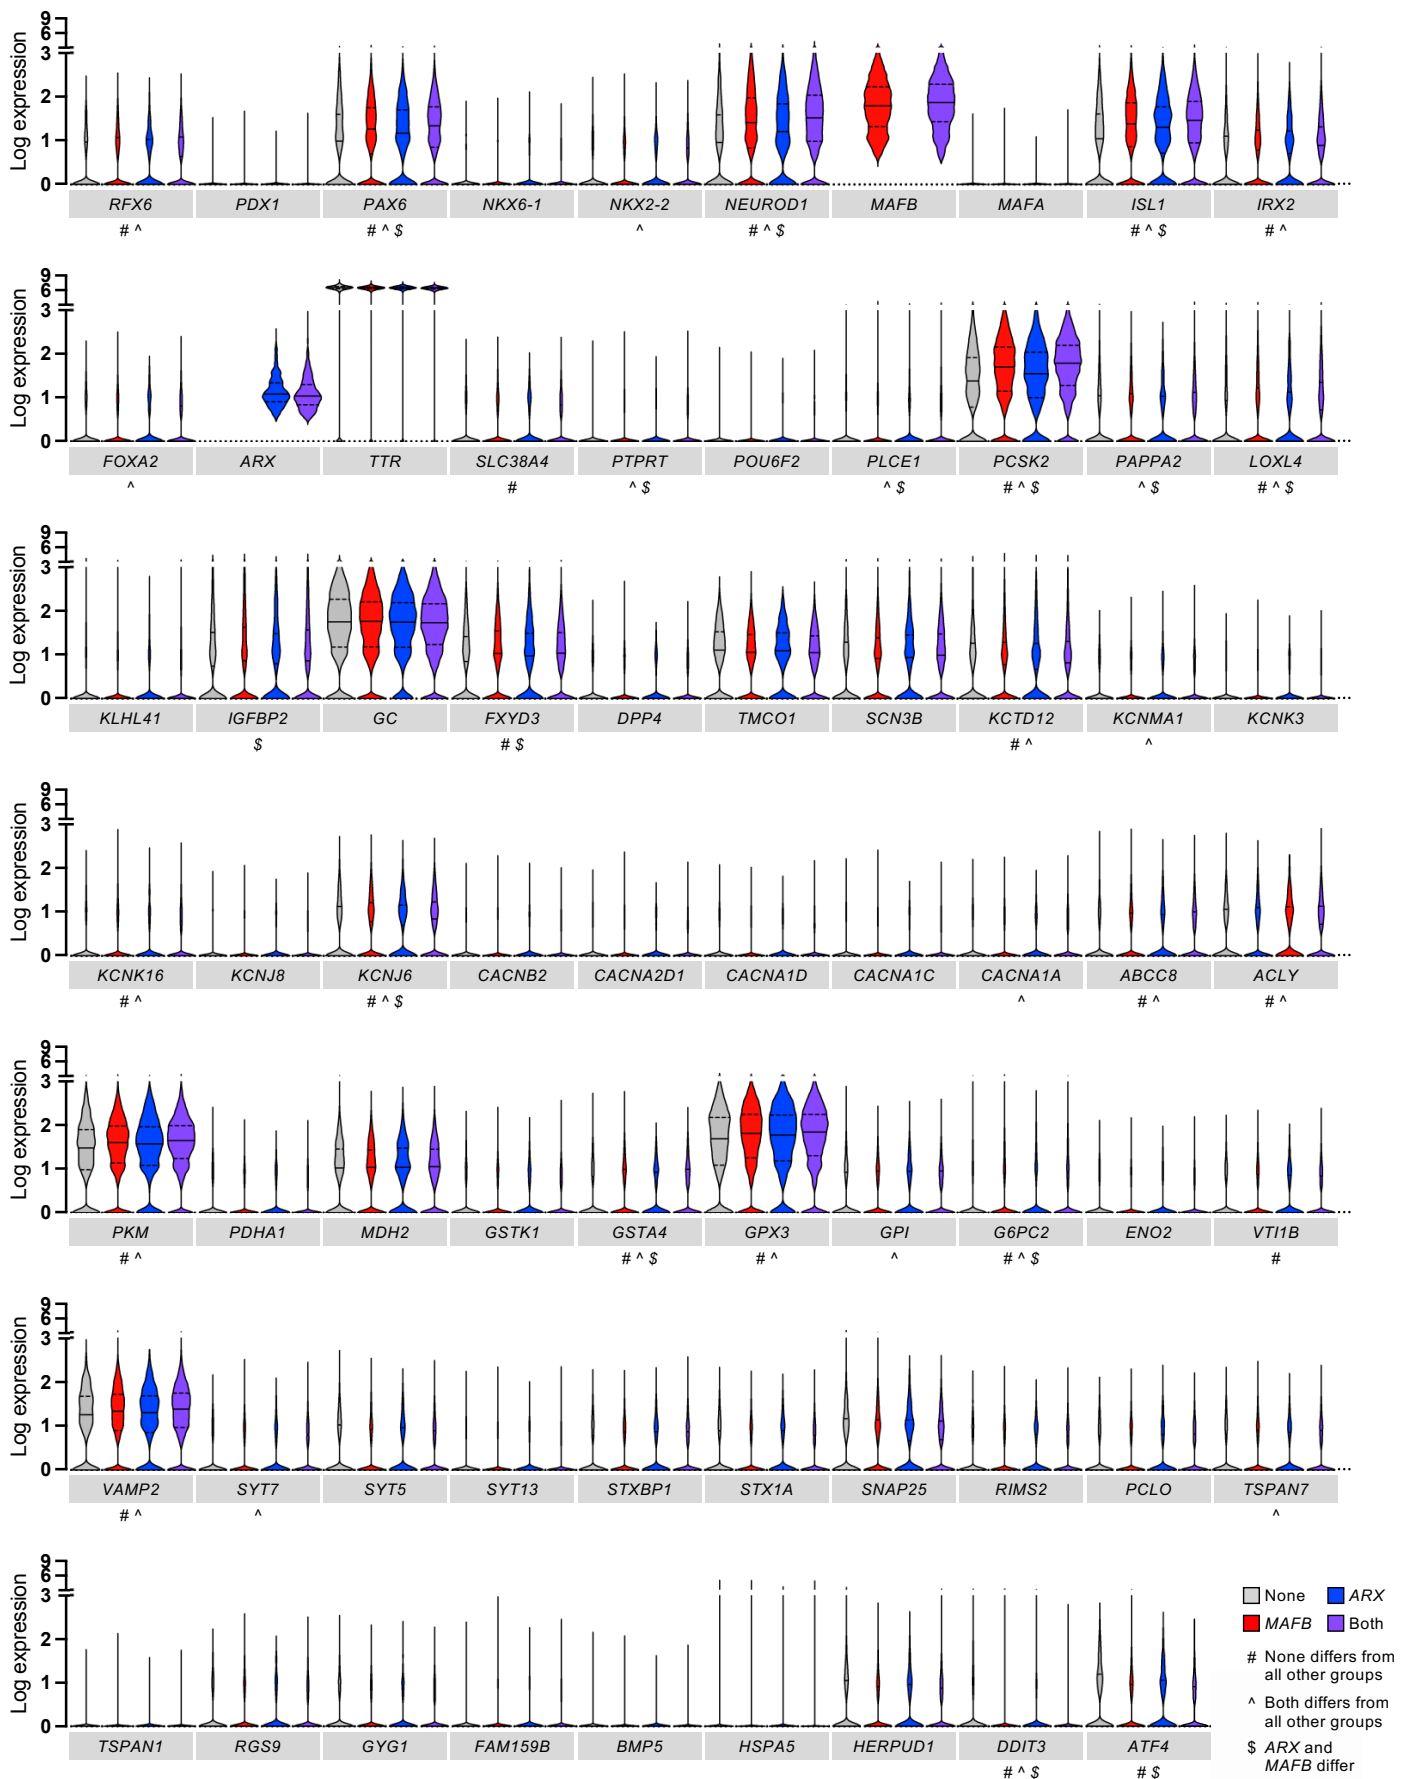

**Supplemental Figure 4. Raw expression values for transcription factor,  $\alpha$  cell-enriched, ion channel, glucose metabolism, vesicle trafficking, exocytosis, and stress genes in ARX/MAFB populations.** Violin plots depict gene expression in a cell populations lacking ARX and MAFB (grey) and those expressing MAFB only (red), ARX only (blue), or co-expressing both MAFB and ARX (purple); n=24,248 total  $\alpha$  cells. Data corresponds to dot plot in **Figure 4C**. Symbols underneath gene names indicate significance ( $p < 0.05$ ) from Tukey's multiple comparisons test following 2-way ANOVA.

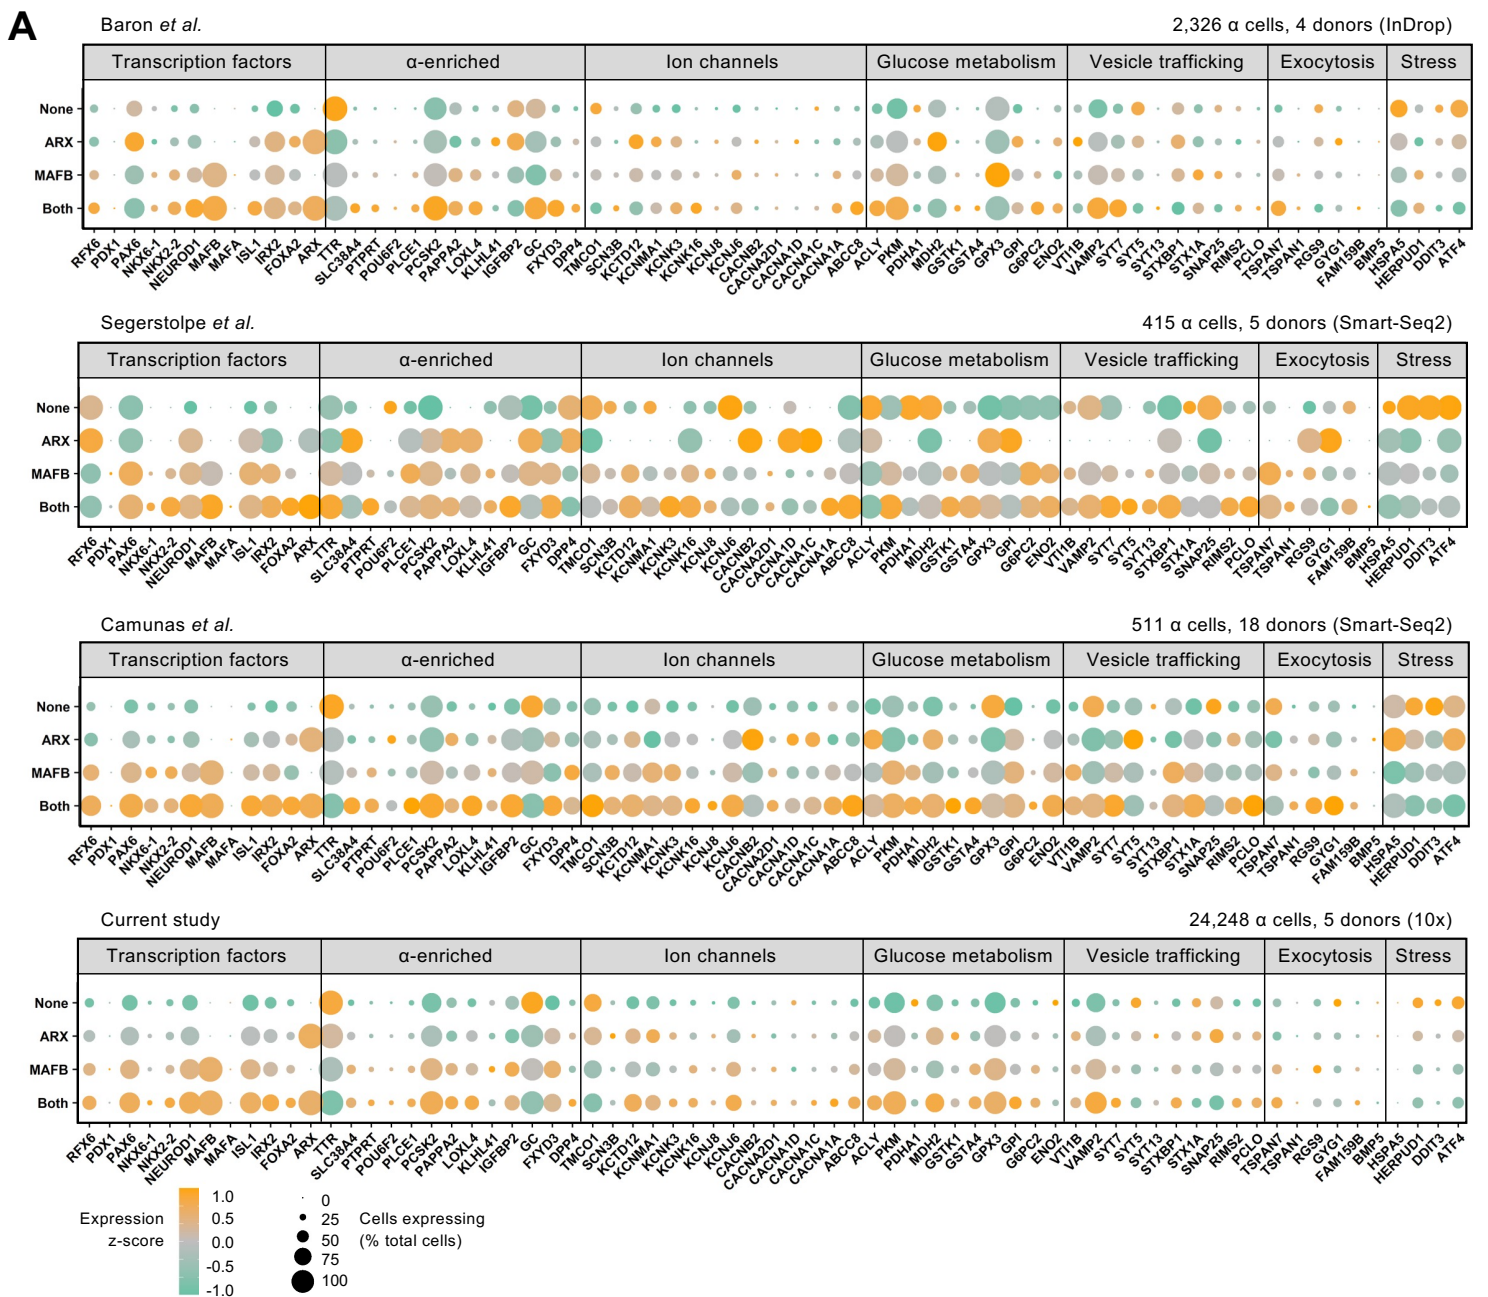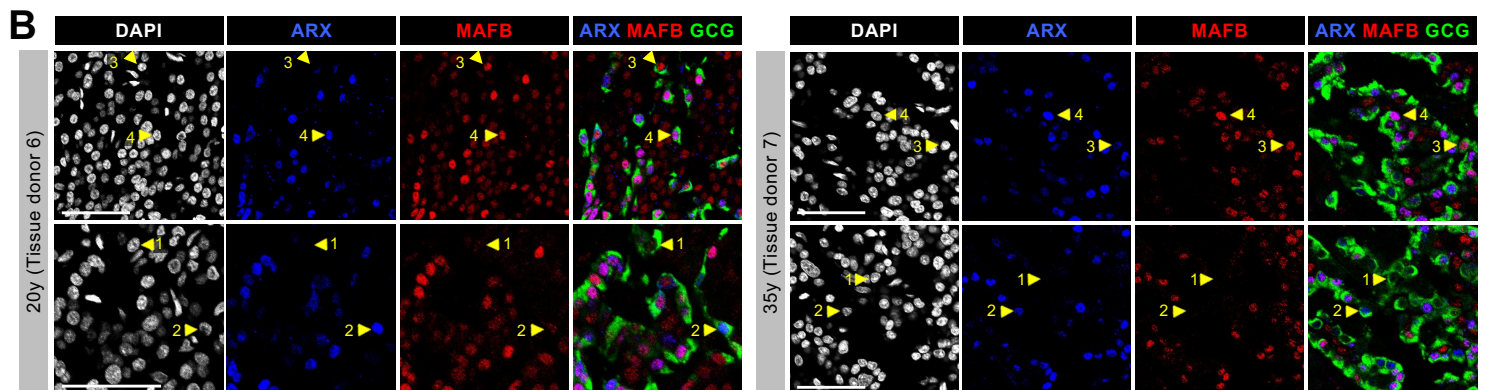

**Supplemental Figure 5. Validation of  $\alpha$  cell populations based on ARX and MAFB expression, as determined by previous scRNA-seq studies. (A)** Dot plots showing the expression patterns of selected genes related to cell identify, ion flux, glucose metabolism, vesicle trafficking, and exocytotic machinery.  $\alpha$  cell populations (rows) are identified by expression of neither ARX nor MAFB (None), ARX only (ARX), MAFB only (MAFB), and co-expression of ARX and MAFB (Both). Dot size indicates the percentage of cells with detectable transcripts; color indicates gene's average scaled expression. Headers list study details from previously published datasets (Segerstolpe *et al.*, 2016 [29]; Baron *et al.*, 2016 [28]; Camunas-Soler *et al.*, 2020 [18]) and final dot plot is as shown in **Figure 4C** for comparison. **(B)** Immunohistochemical staining of ARX (blue) and MAFB (red) in glucagon (GCG) expressing  $\alpha$  cells (green) of two nondiabetic adults (**Table S4**). Numbered arrowheads indicate the presence of  $\alpha$  cell populations: 1, ARX<sup>lo</sup> MAFB<sup>lo</sup>; 2, ARX<sup>hi</sup> MAFB<sup>lo</sup>; 3, ARX<sup>lo</sup> MAFB<sup>hi</sup>; 4, ARX<sup>hi</sup> MAFB<sup>hi</sup>. See also **Figure 4E**.

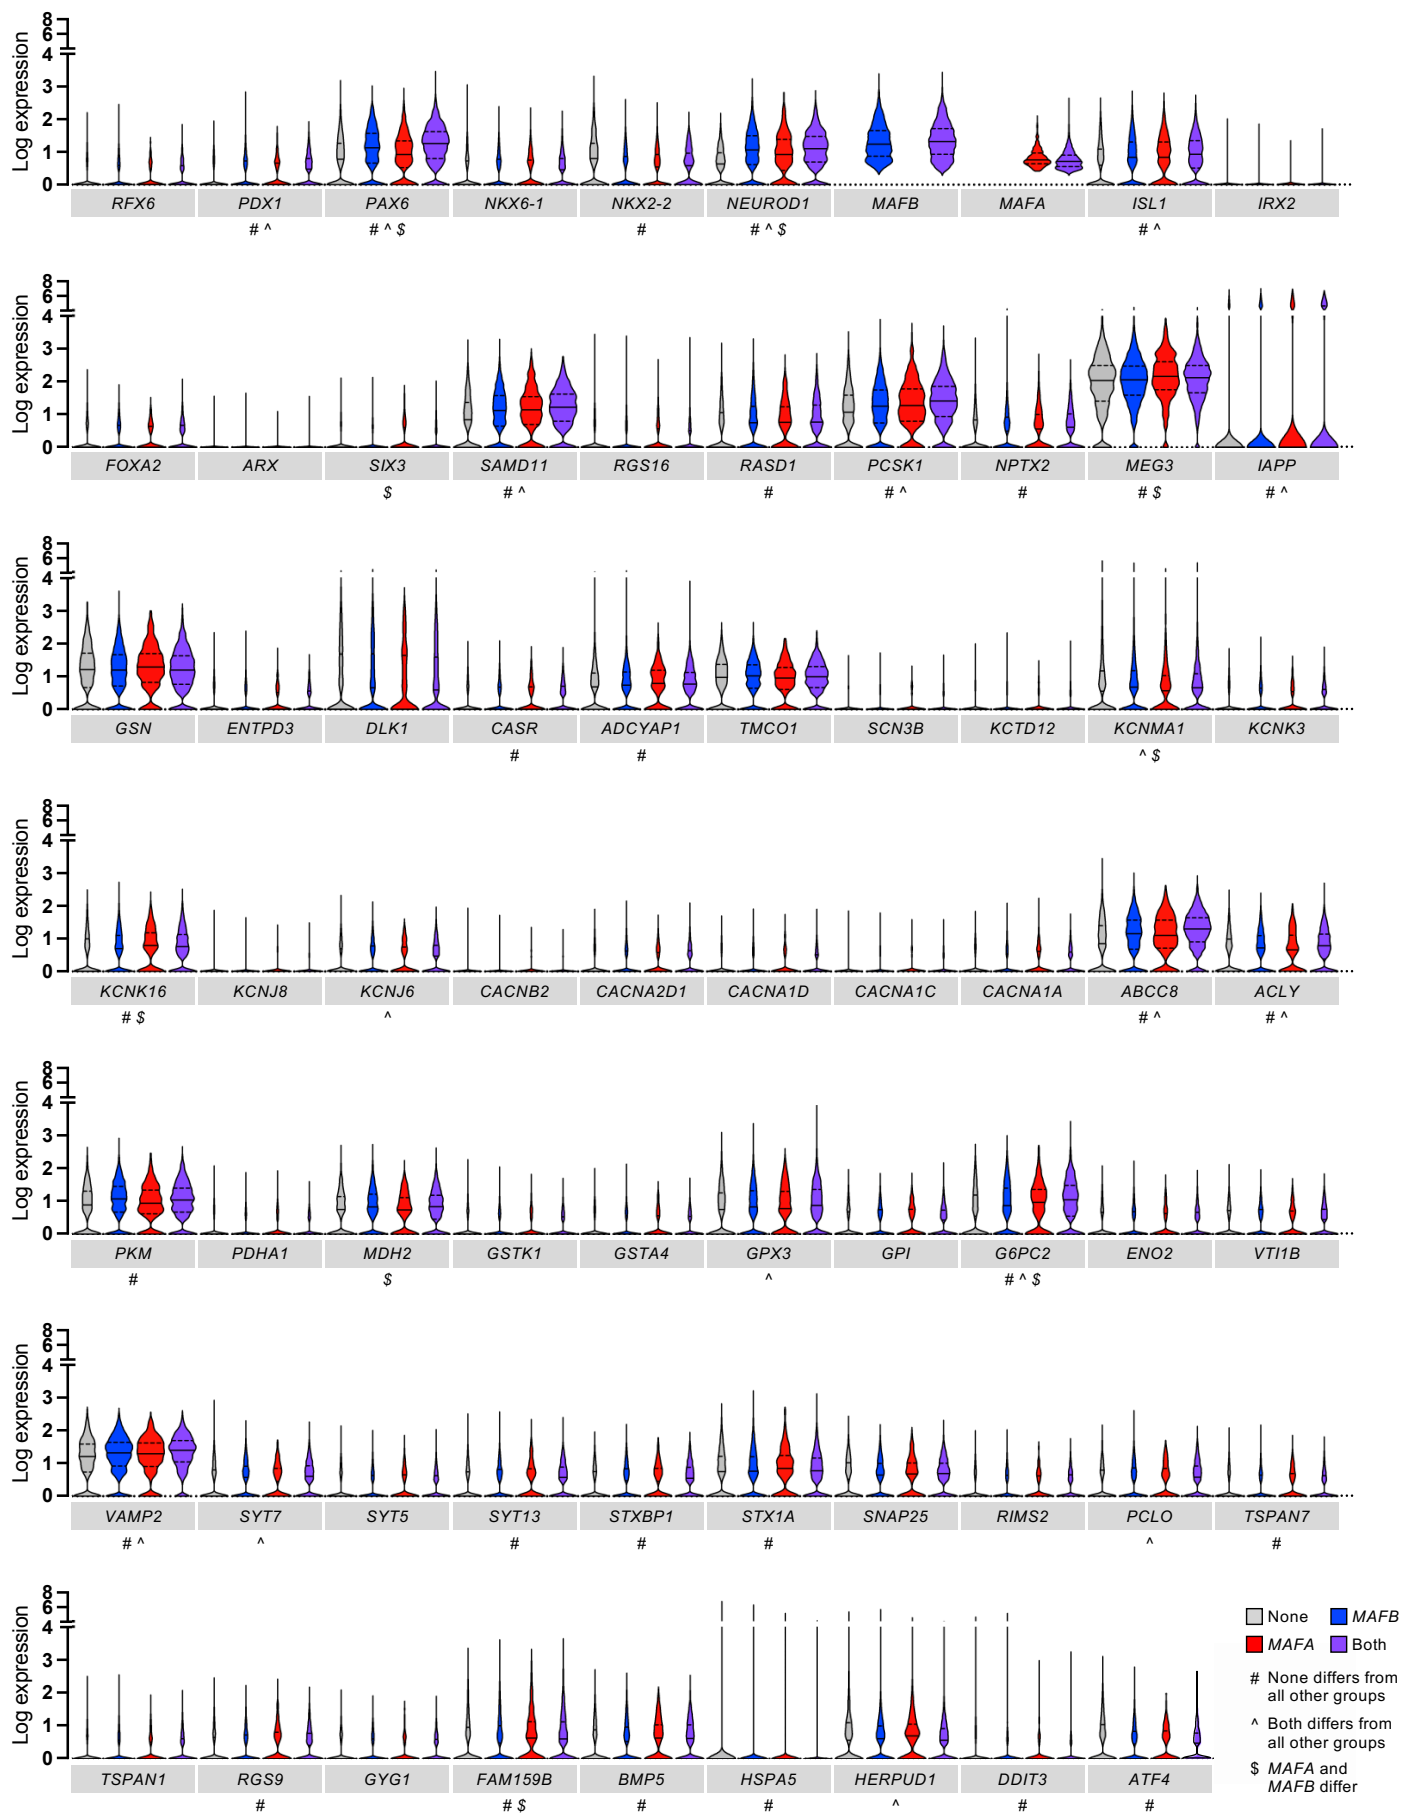

**Supplemental Figure 6. Raw expression values for transcription factor,  $\beta$ -enriched, ion channel, glucose metabolism, vesicle trafficking, exocytosis, and stress genes in *MAFA/MAFB* populations.** Violin plots depict gene expression in  $\beta$  cell populations ( $n=11,034$  total  $\beta$  cells) lacking *MAFA* and *MAFB* (grey) and those expressing *MAFA* only (red), *MAFB* only (blue), or co-expressing both *MAFA* and *MAFB* (purple);  $n=11,034$  total  $\beta$  cells. Data corresponds to dot plot in **Figure 5C**. Symbols underneath gene names indicate significance ( $p<0.05$ ) from Tukey's multiple comparisons test following 2-way ANOVA.

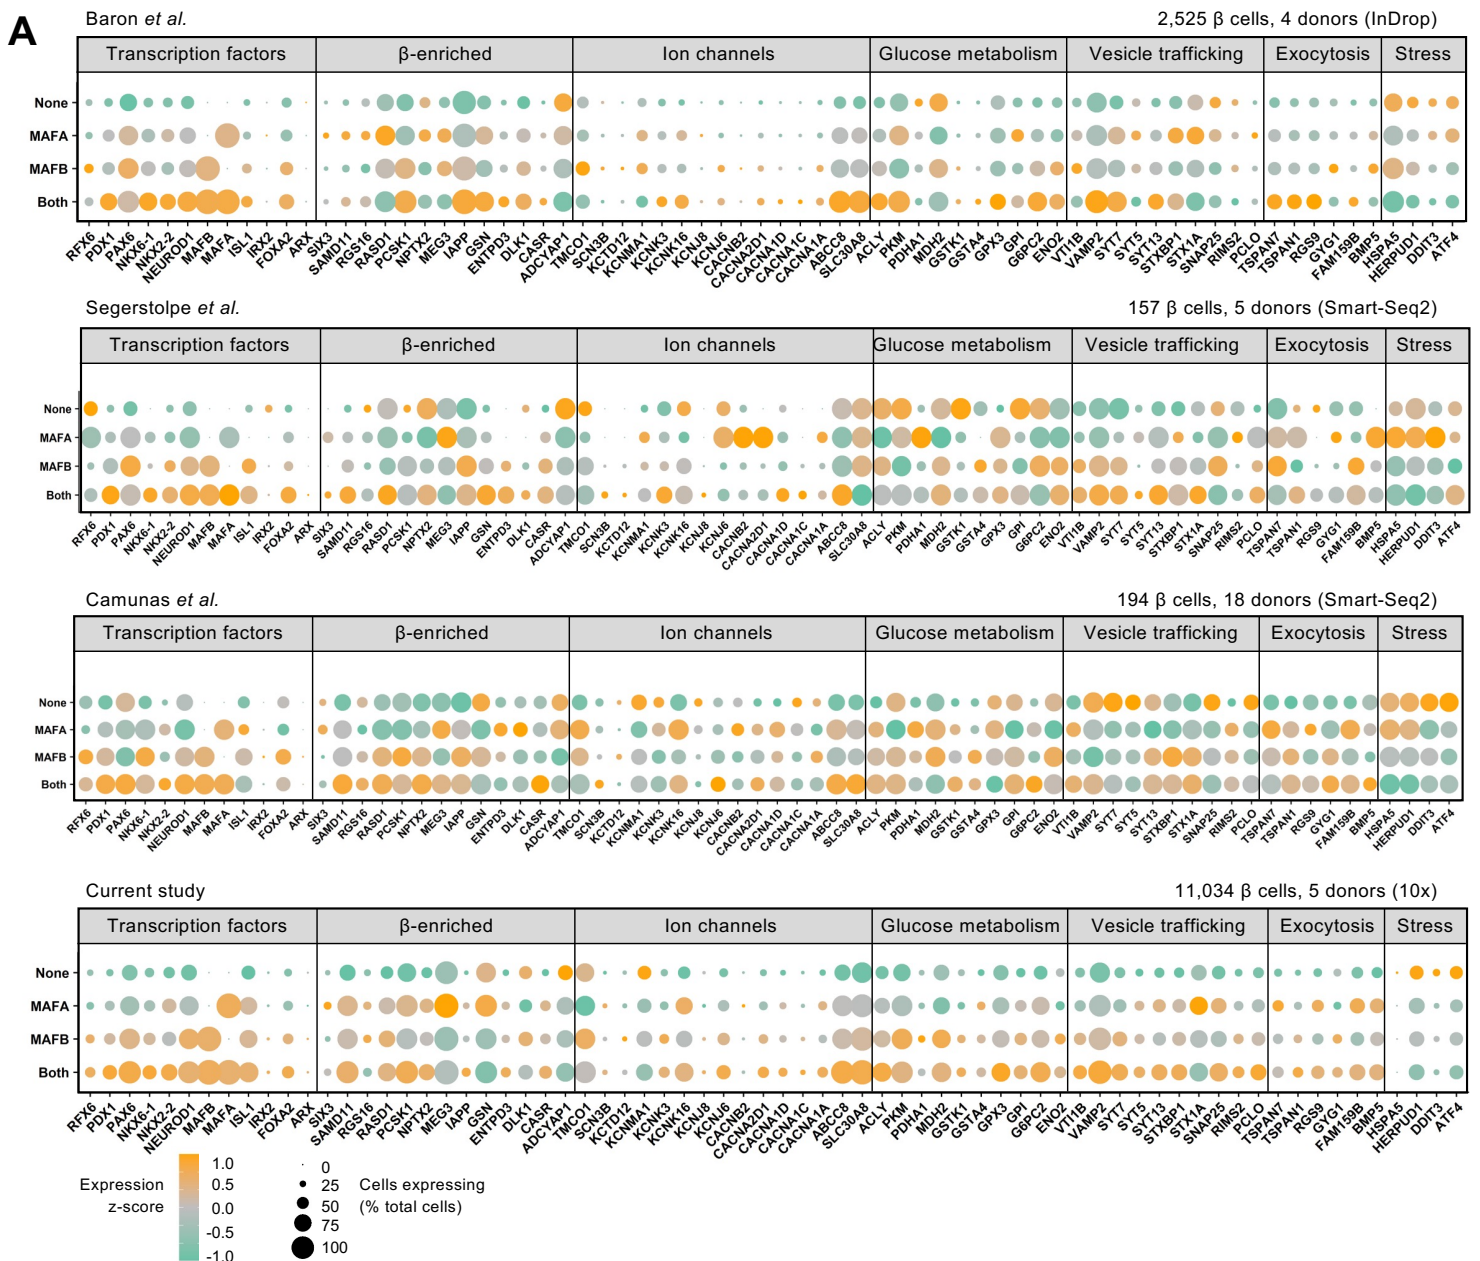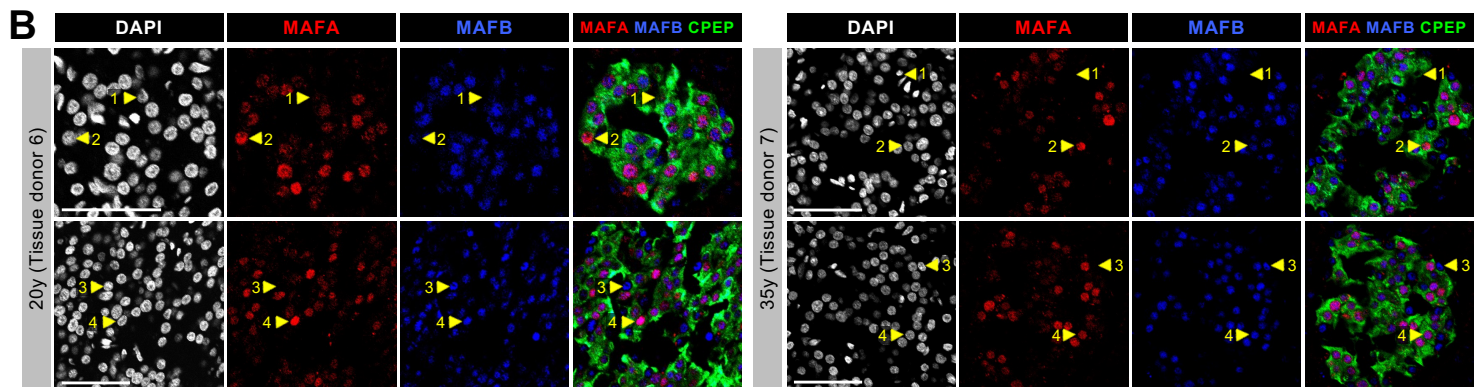

**Supplemental Figure 7. Validation of  $\beta$  cell populations based on *MAFA* and *MAFB* expression, as determined by previous scRNA-seq studies. (A)** Dot plots showing the expression patterns of selected genes related to cell identify, ion flux, glucose metabolism, vesicle trafficking, and exocytotic machinery.  $\beta$  cell populations (rows) are identified by expression of neither *MAFA* nor *MAFB* (None), *MAFA* only (*MAFA*), *MAFB* only (*MAFB*), and co-expression of *MAFA* and *MAFB* (Both). Dot size indicates the percentage of cells with detectable transcripts; color indicates gene's average scaled expression. Headers list study details from previously published datasets (Seegerstolpe *et al.*, 2016 [29]; Baron *et al.*, 2016 [28]; Camunas-Soler *et al.*, 2020 [18]) and final dot plot is as shown in **Figure 5C** for comparison. **(B)** Immunohistochemical staining of *MAFA* (red) and *MAFB* (blue) in C-peptide (CPEP)-expressing  $\beta$  cells (green) of two nondiabetic adults (**Table S4**). Numbered arrowheads indicate the presence of  $\beta$  cell populations: 1, *MAFA*<sup>lo</sup> *MAFB*<sup>lo</sup>; 2, *MAFA*<sup>hi</sup> *MAFB*<sup>lo</sup>; 3, *MAFA*<sup>lo</sup> *MAFB*<sup>hi</sup>; 4, *MAFA*<sup>hi</sup> *MAFB*<sup>hi</sup>. See also **Figure 5E**.



## Table S1. Human Islet Donor Information

### Checklist for Reporting Human Islet Preparations Used in Research

Adapted from Hart NJ, Powers AC (2018) Progress, challenges, and suggestions for using human islets to understand islet biology and human diabetes. *Diabetologia* <https://doi.org/10.1007/s00125-018-4772-2>.

| Islet preparation                                                    | 1                          | 2                            | 3                          | 4                          | 5                          |
|----------------------------------------------------------------------|----------------------------|------------------------------|----------------------------|----------------------------|----------------------------|
| Unique identifier                                                    | DON184                     | DON185                       | RRID:<br>SAMN08768781      | RRID:<br>SAMN08768783      | R232                       |
| Donor age (years)                                                    | 14                         | 39                           | 50                         | 59                         | 66                         |
| Donor sex                                                            | Male                       | Female                       | Male                       | Female                     | Female                     |
| Donor BMI (kg/m <sup>2</sup> )                                       | 24.13                      | 34.76                        | 22.4                       | 32.3                       | 18.5                       |
| Donor HbA1c (ng/mL)                                                  | 5.4                        | 4.7                          | N/A                        | N/A                        | 6.1                        |
| Origin/source of islets                                              | OPO                        | OPO                          | IIDP                       | IIDP                       | ADI                        |
| Islet isolation center                                               | University of Pennsylvania | University of Pennsylvania   | University of Pennsylvania | University of Wisconsin    | University of Alberta      |
| Donor history of diabetes? Yes/No                                    | No                         | No                           | No                         | No                         | No                         |
| Donor cause of death                                                 | Anoxia/<br>Cardiovascular  | Anoxia/<br>Drug intoxication | Cerebrovascular/<br>Stroke | Cerebrovascular/<br>Stroke | Cerebrovascular/<br>Stroke |
| Glucose-stimulated insulin secretion or other functional measurement | Perifusion                 | Perifusion                   | Perifusion                 | Perifusion                 | Perifusion                 |
| Handpicked to purity? Yes/No                                         | Yes                        | Yes                          | Yes                        | Yes                        | Yes                        |
| Warm ischaemia time (hours)                                          | N/A                        | N/A                          | No                         | No                         | N/A                        |
| Cold ischaemia time (hours)                                          | 12                         | 8.5                          | 9.9                        | N/A                        | N/A                        |
| Estimated purity (%)                                                 | 75                         | 95                           | 95                         | 95                         | 90                         |
| Total culture time (hours)                                           | 36                         | 96                           | 19                         | 44                         | 144                        |

ADI, Alberta Diabetes Institute; IIDP, Integrated Islet Distribution Program; N/A, not available; OPO, Organ Procurement Organization

**Table S2. Markers used for cell type annotation**

| <b>Cell type</b> | <b>Gene marker(s)</b> |
|------------------|-----------------------|
| $\alpha$ cell    | <i>GCG</i>            |
| $\beta$ cell     | <i>INS</i>            |
| $\delta$ cell    | <i>SST</i>            |
| $\gamma$ cell    | <i>PPY</i>            |
| $\epsilon$ cell  | <i>GHRL</i>           |
| Acinar           | <i>PRSS1</i>          |
| Ductal           | <i>KRT19</i>          |
| Stellate         | <i>PDGFRB, COL1A1</i> |
| Endothelial      | <i>PECAM1</i>         |
| Immune           | <i>HLA-DRA</i>        |

**Table S3. Antibodies used for immunohistochemistry and flow cytometry**

| Antigen/Conjugate        | Species | Source                               | Catalog #   | Application | Dilution |
|--------------------------|---------|--------------------------------------|-------------|-------------|----------|
| ARX                      | Sheep   | R&D Systems                          | AF7068      | IHC (1°)    | 1:2000   |
| C-peptide                | Rat     | Developmental Studies Hybridoma Bank | GN-ID4      | IHC (1°)    | 1:200    |
| NTPDase3 (CD39L3)        | Mouse   | J. Sévigny                           | N/A         | FC (1°)     | 1:50     |
| Glucagon                 | Mouse   | Abcam                                | ab10988     | IHC (1°)    | 1:100    |
| HPa3 (HIC3-2D12)         | Mouse   | P. Streeter/M. Grompe                | N/A         | FC (1°)     | 1:200    |
| HPi1 (HIC0-4F9) – biotin | Mouse   | Novus                                | NBP1-18872B | FC (1°)     | 1:100    |
| MAFA                     | Rabbit  | Novus                                | NBP1-00121  | IHC (1°)    | 1:250    |
| MAFB                     | Mouse   | R&D Systems                          | MAB3810     | IHC (1°)    | 1:1000   |
| Mouse Ig – APC           | Goat    | BD Biosciences                       | 550826      | FC (2°)     | 1:500    |
| Mouse IgG – Cy3          | Donkey  | Jackson Immunoresearch               | 715-165-150 | IHC (2°)    | 1:500    |
| Mouse IgG – Cy5          | Donkey  | Jackson Immunoresearch               | 715-175-150 | IHC (2°)    | 1:300    |
| Mouse IgM – PE           | Goat    | Jackson Immunoresearch               | 115-116-075 | FC (2°)     | 1:1000   |
| Rabbit IgG – Cy3         | Donkey  | Jackson Immunoresearch               | 711-165-152 | IHC (2°)    | 1:500    |
| Rabbit IgG – Cy5         | Donkey  | Jackson Immunoresearch               | 711-175-152 | IHC (2°)    | 1:300    |
| Rat IgG – Cy2            | Donkey  | Jackson Immunoresearch               | 712-225-153 | IHC (2°)    | 1:500    |
| Sheep IgG – Cy2          | Donkey  | Jackson Immunoresearch               | 713-225-147 | IHC (2°)    | 1:500    |
| Streptavidin – BV420     | N/A     | BD Biosciences                       | 563259      | FC (2°)     | 1:500    |

1°, primary antibody; 2°, secondary antibody; FC, flow cytometry; IHC, immunohistochemistry

## Table S4. Human Pancreatic Tissue Donor Information

### Checklist for Reporting Human Islet Preparations Used in Research

Adapted from Hart NJ, Powers AC (2018) Progress, challenges, and suggestions for using human islets to understand islet biology and human diabetes. *Diabetologia* <https://doi.org/10.1007/s00125-018-4772-2>.

| Pancreatic tissue                                                    | 6           | 7           | 8                      |
|----------------------------------------------------------------------|-------------|-------------|------------------------|
| Unique identifier                                                    | DON54       | DON42       | DON61                  |
| Donor age (years)                                                    | 20          | 35          | 55                     |
| Donor sex                                                            | Male        | Male        | Male                   |
| Donor BMI (kg/m <sup>2</sup> )                                       | 19.442      | 26.852      | 35.565                 |
| Donor HbA1c (ng/mL)                                                  | 5.6         | 5.1         | Not recorded           |
| Origin/source of tissue                                              | IIAM        | IIAM        | IIAM                   |
| Donor history of diabetes? Yes/No                                    | No          | No          | No                     |
| Donor cause of death                                                 | Head trauma | Head trauma | Cerebrovascular/Stroke |
| Glucose-stimulated insulin secretion or other functional measurement | Not done    | Not done    | Not done               |
| Warm ischemia time (hours)                                           | DBD         | DBD         | No                     |
| Cold ischemia time (hours)                                           | 6.2         | 15.1        | 26.6                   |

*ADI, Alberta Diabetes Institute; DBD, Donation after Brain Death (minimal warm ischemia time); IIAM, International Institute for the Advancement of Medicine*
